# Supplementary material for: Respiratory Syncytial Virus G Protein Sequence Variability among Isolates from St. Petersburg, Russia, during the 2013–2014 Epidemic Season
Source: MDPI journal article supplement (doi:10.3390/v13010119), 2021-01-17
Supplement: s1 [file s1]

**Supplementary table 1.** The occurrence of amino acid substitutions with predicted functional significance in RSV-A G protein dataset (CD – central domain, TMD – transmembrane domain, I HVR – I hypervariable region, II HVR – II hypervariable region). Unique substitutions observed in Russian sequences only are highlighted.

| AA residue | Position |      |      |      |      |      |      |       |      |      |                |      |      |      |      |      |                |     |     |      |     |      |      |      |     |      |
|------------|----------|------|------|------|------|------|------|-------|------|------|----------------|------|------|------|------|------|----------------|-----|-----|------|-----|------|------|------|-----|------|
|            | CD       |      |      |      |      | TMD  |      | I HVR | CCR  |      | II HVR (N-end) |      |      |      |      |      | II HVR (C-end) |     |     |      |     |      |      |      |     |      |
|            | 4        | 5    | 7    | 8    | 11   | 42   | 44   | 102   | 177  | 184  | 196            | 206  | 207  | 216  | 225  | 248  | 271            | 274 | 275 | 290  | 298 | 303  | 304  | 310  | 314 | 317  |
| ?          | 1        | 0    | 0    | 0    | 5    | 0    | 0    | 0     | 0    | 0    | 0              | 0    | 0    | 0    | 0    | 0    | 0              | 0   | 0   | 2    | 0   | 0    | 0    | 1    | 4   | 3    |
| A          | 1        | 0    | 0    | 0    | 0    | 3    | 1    | 0     | 0    | 1436 | 0              | 0    | 0    | 0    | 343  | 0    | 0              | 0   | 0   | 0    | 0   | 21   | 0    | 0    | 0   | 1    |
| C          | 0        | 0    | 0    | 1    | 0    | 0    | 0    | 0     | 1    | 0    | 0              | 0    | 0    | 0    | 0    | 0    | 0              | 0   | 0   | 0    | 0   | 0    | 0    | 0    | 0   | 1    |
| D          | 0        | 0    | 0    | 0    | 0    | 0    | 0    | 0     | 0    | 0    | 0              | 0    | 0    | 0    | 0    | 0    | 2              | 0   | 0   | 0    | 0   | 0    | 0    | 0    | 0   | 0    |
| E          | 0        | 0    | 0    | 0    | 2    | 0    | 0    | 0     | 0    | 0    | 1              | 0    | 0    | 0    | 0    | 0    | 544            | 0   | 0   | 0    | 0   | 0    | 0    | 0    | 0   | 0    |
| F          | 0        | 0    | 0    | 0    | 0    | 0    | 0    | 280   | 0    | 0    | 0              | 0    | 0    | 0    | 0    | 3    | 0              | 0   | 0   | 0    | 0   | 1    | 0    | 0    | 0   | 19   |
| G          | 0        | 0    | 0    | 0    | 0    | 0    | 0    | 0     | 0    | 0    | 0              | 0    | 0    | 0    | 0    | 0    | 0              | 0   | 3   | 0    | 0   | 0    | 0    | 0    | 0   | 0    |
| H          | 0        | 1    | 0    | 6    | 0    | 0    | 0    | 0     | 0    | 0    | 0              | 0    | 0    | 0    | 0    | 0    | 0              | 0   | 0   | 1417 | 0   | 0    | 272  | 0    | 0   | 0    |
| I          | 0        | 0    | 0    | 0    | 0    | 9    | 0    | 0     | 0    | 0    | 0              | 0    | 36   | 17   | 1    | 23   | 0              | 0   | 0   | 0    | 0   | 250  | 0    | 2    | 1   | 0    |
| K          | 0        | 1383 | 0    | 0    | 1402 | 0    | 0    | 0     | 0    | 0    | 1438           | 0    | 0    | 1395 | 0    | 0    | 21             | 0   | 0   | 0    | 0   | 0    | 0    | 0    | 0   | 0    |
| L          | 0        | 0    | 0    | 0    | 0    | 0    | 0    | 0     | 0    | 0    | 0              | 1    | 0    | 0    | 20   | 1413 | 0              | 259 | 0   | 0    | 690 | 0    | 0    | 1312 | 548 | 0    |
| M          | 0        | 0    | 0    | 0    | 0    | 0    | 0    | 0     | 0    | 0    | 1              | 0    | 0    | 0    | 0    | 0    | 0              | 0   | 0   | 0    | 0   | 0    | 0    | 0    | 0   | 0    |
| N          | 19       | 0    | 0    | 0    | 1    | 0    | 0    | 0     | 1    | 0    | 0              | 0    | 0    | 23   | 0    | 0    | 0              | 0   | 1   | 4    | 0   | 0    | 0    | 0    | 0   | 0    |
| P          | 2        | 0    | 2    | 0    | 0    | 0    | 0    | 0     | 0    | 1    | 0              | 1306 | 1    | 0    | 0    | 1    | 0              | 291 | 0   | 0    | 487 | 0    | 0    | 122  | 873 | 7    |
| Q          | 0        | 1    | 1385 | 0    | 0    | 0    | 0    | 0     | 0    | 0    | 0              | 133  | 0    | 2    | 0    | 0    | 0              | 0   | 0   | 2    | 7   | 0    | 0    | 0    | 0   | 0    |
| R          | 0        | 1    | 1    | 1381 | 2    | 0    | 0    | 0     | 1    | 0    | 0              | 0    | 0    | 2    | 0    | 0    | 0              | 0   | 0   | 5    | 0   | 0    | 0    | 0    | 0   | 0    |
| S          | 0        | 0    | 0    | 0    | 0    | 0    | 1413 | 1156  | 1437 | 1    | 0              | 0    | 0    | 0    | 0    | 0    | 0              | 16  | 563 | 0    | 1   | 0    | 7    | 0    | 9   | 1401 |
| T          | 1363     | 0    | 0    | 0    | 0    | 1402 | 0    | 4     | 0    | 2    | 0              | 0    | 1403 | 0    | 5    | 0    | 0              | 0   | 0   | 0    | 254 | 0    | 0    | 0    | 0   | 0    |
| V          | 0        | 0    | 0    | 0    | 0    | 0    | 0    | 0     | 0    | 0    | 0              | 0    | 0    | 0    | 1071 | 0    | 0              | 1   | 0   | 0    | 0   | 1166 | 0    | 0    | 0   | 0    |
| Y          | 0        | 0    | 0    | 0    | 0    | 0    | 0    | 0     | 0    | 0    | 0              | 0    | 0    | 1    | 0    | 0    | 0              | 0   | 0   | 10   | 0   | 0    | 1159 | 0    | 0   | 0    |
