# Supplementary material for: Respiratory Syncytial Virus G Protein Sequence Variability among Isolates from St. Petersburg, Russia, during the 2013–2014 Epidemic Season
Source: MDPI journal article supplement (doi:10.3390/v13010119), 2021-01-17
Supplement: s1 [file s1]

Long

RSVA/St\_Petersburg/479/2014  
RSVA/St\_Petersburg/878/2014  
RSVA/St\_Petersburg/1086/2014  
RSVA/St\_Petersburg/1743/2014  
RSVA/St\_Petersburg/3513/2014  
RSVA/St\_Petersburg/3546/2014  
RSVA/St\_Petersburg/4210/2014  
RSVA/St\_Petersburg/5904/2014  
RSVA/St\_Petersburg/5934/2014  
RSVA/St\_Petersburg/7108/2014  
RSVA/St\_Petersburg/10891/2014  
RSVA/St\_Petersburg/14959/2014  
RSVA/St\_Petersburg/15849/2014  
RSVA/St\_Petersburg/16063/2014  
RSVA/St\_Petersburg/6021/2014  
RSVA/St\_Petersburg/7036/2014  
RSVA/St\_Petersburg/5133/2014  
RSVA/St\_Petersburg/6959/2014  
RSVA/St\_Petersburg/7028/2014  
RSVA/St\_Petersburg/8951/2014  
RSVA/St\_Petersburg/14597/2014  
RSVA/St\_Petersburg/6602/2014  
RSVA/St\_Petersburg/5577/2014  
RSVA/St\_Petersburg/11101/2014  
RSVA/St\_Petersburg/13764/2014  
RSVA/St\_Petersburg/5002/2014

10 20 30 40 50 60 70 80 90 100  
 MSKTKDQRTAKTLERTWDTLNHLLFISSCLYKLNLSIAQITLSILAMIISTSLIIAAIIFIASANHKVTLTTTAIIQDATNQIKNTTPTTYLTQNPQLGIS  
 . . . . . N . . . . . K . . . . . G . . . . . T . . . . . S . . . . . D . . . . .  
 . . . . . N . . . . . V . . . . . P . . . . . S . . . . .  
 . . . . . I . . . . .  
 . . . . . P . . . . . S . . . . .  
 N H . . . . . V . . . . .  
 P . . . . . I . . . . .  
 H . . . . .  
 Q . . . . . I . . . . .  
 N H . . . . .  
 H . . . . .  
 R . . . . .  
 G . . . . .  
 A . . . . .

[illegible]

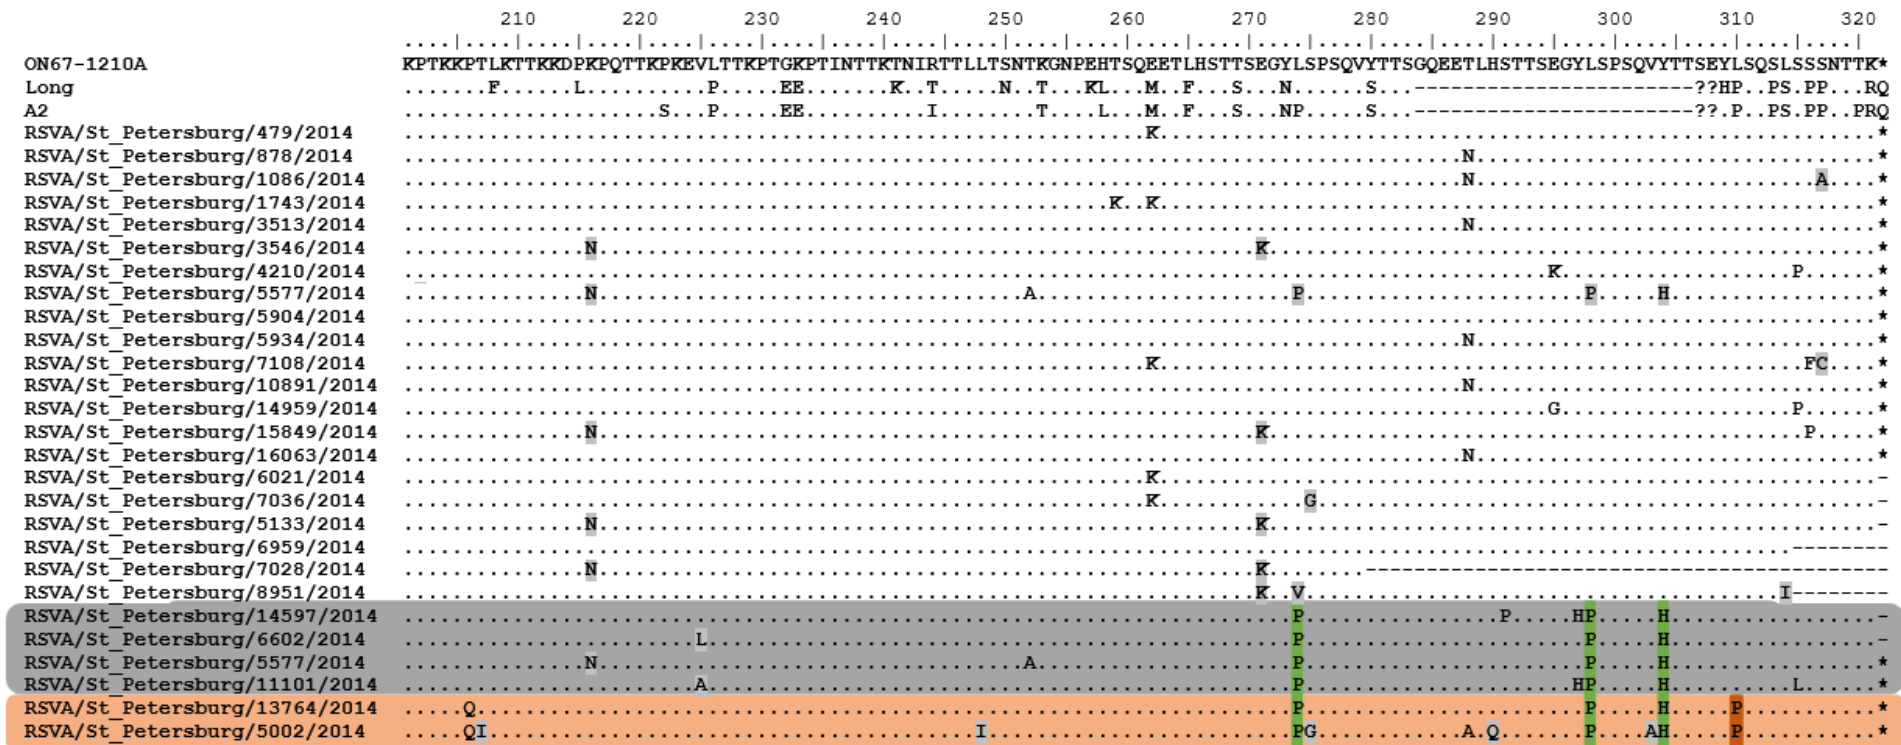

**Supplementary figure 2.** G protein amino acid alignment of St. Petersburg RSV-A isolates, 2013-2014 epidemic season. With grey shadow for 2.1 subcluster, orange – 3.1 subcluster. All substitutions discussed are filled with grey, 2.1 subcluster defining substitutions are filled with green, extra substitution defining 3.1 subcluster is filled with brown.
